# Supplementary material for: Prismatic Ta3N5-composed spheres produced by self-sacrificial template-like conversion of Ta particles via Na2CO3 flux
Source: Royal Society of Chemistry journal article supplement (doi:10.1039/d0ce00589d), 2020-01-01
Supplement: d0ce00589d1.pdf [file d0ce00589d1.pdf]

*Electronic Supplementary Information (ESI)*

**Prismatic Ta<sub>3</sub>N<sub>5</sub>-composed spheres produced by self-sacrificial template-like conversion of Ta particles via Na<sub>2</sub>CO<sub>3</sub> flux**

Sayaka Suzuki,<sup>a</sup> Ryota Ando,<sup>a</sup> Yusaku Matsui,<sup>a</sup> Katsunori Isechi,<sup>a</sup> Kunio Yubuta<sup>b</sup> and Katsuya Teshima<sup>\*ac</sup>

<sup>a</sup> Department of Materials Chemistry, Faculty of Engineering, Shinshu University, 4-17-1 Wakasato, Nagano 380-8553, Japan. E-mail: teshima@shinshu-u.ac.jp

<sup>b</sup> Institute for Materials Research, Tohoku University, 2-1-1 Katahira, Aoba-ku, Sendai 980-8577, Japan

<sup>c</sup> Research Initiative for Supra-Materials, Shinshu University, 4-17-1 Wakasato, Nagano 380-8553, Japan

*\*Corresponding Author: Katsuya Teshima*

*E-mail: teshima@shinshu-u.ac.jp*

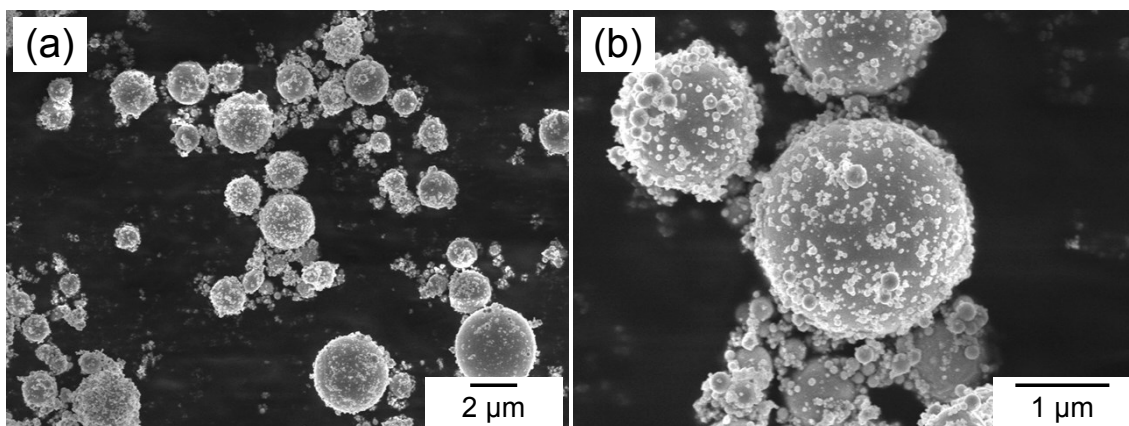

**Fig. S1** (a) Low- and (b) high-magnification SEM images of small Ta powder.

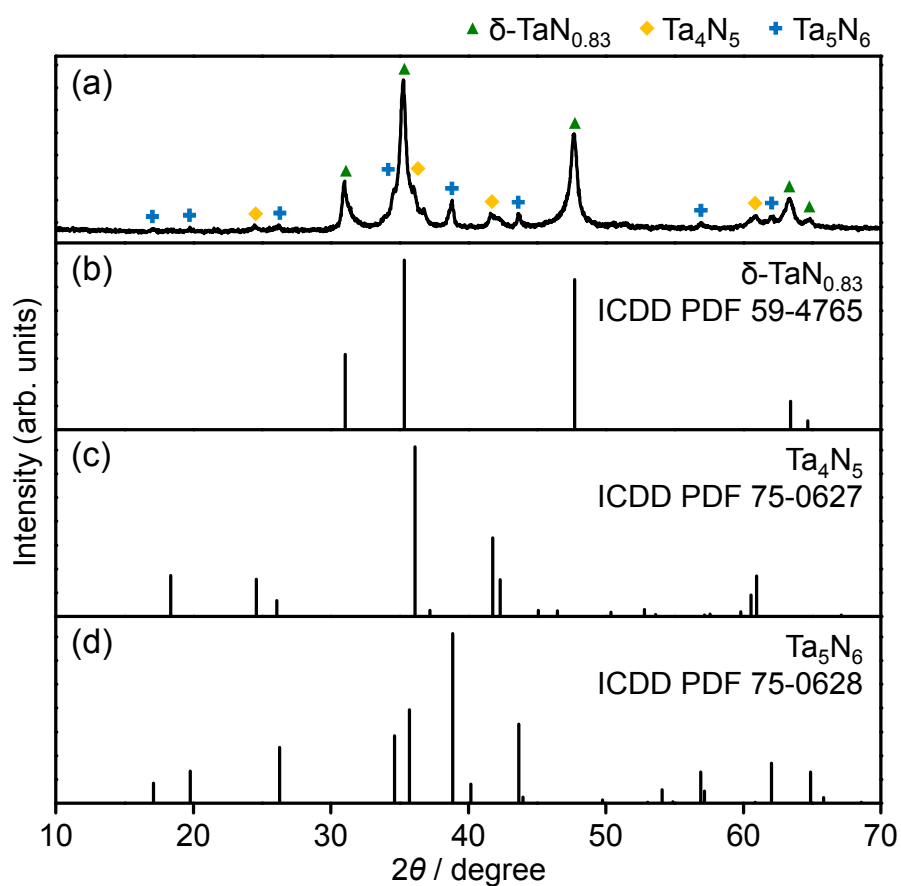

**Fig. S2** (a) XRD patterns of powders heated under  $\text{NH}_3$  flow without flux; and the ICDD PDFs of (b)  $\delta\text{-TaN}_{0.83}$ , (c)  $\text{Ta}_4\text{N}_5$ , and (d)  $\text{Ta}_5\text{N}_6$ .

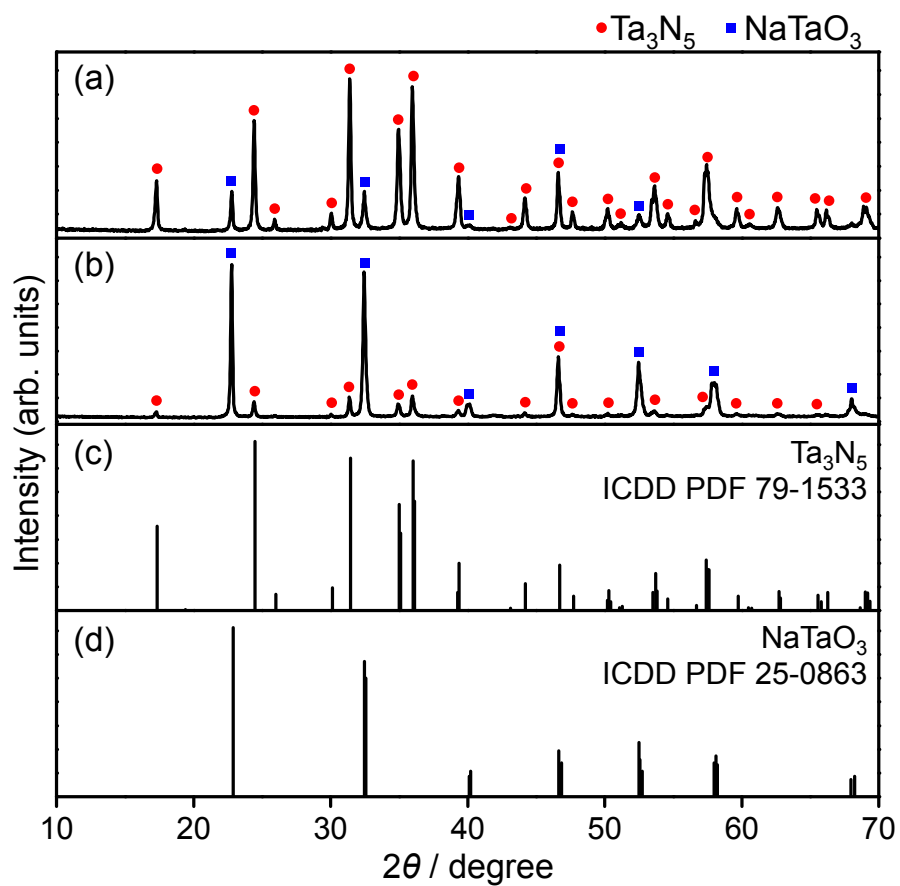

**Fig. S3** XRD patterns of the crystals grown at Ta concentrations of (a) 80 and (b) 50 mol%; and the ICDD PDFs of (c)  $\text{Ta}_3\text{N}_5$  and (d)  $\text{NaTaO}_3$ .

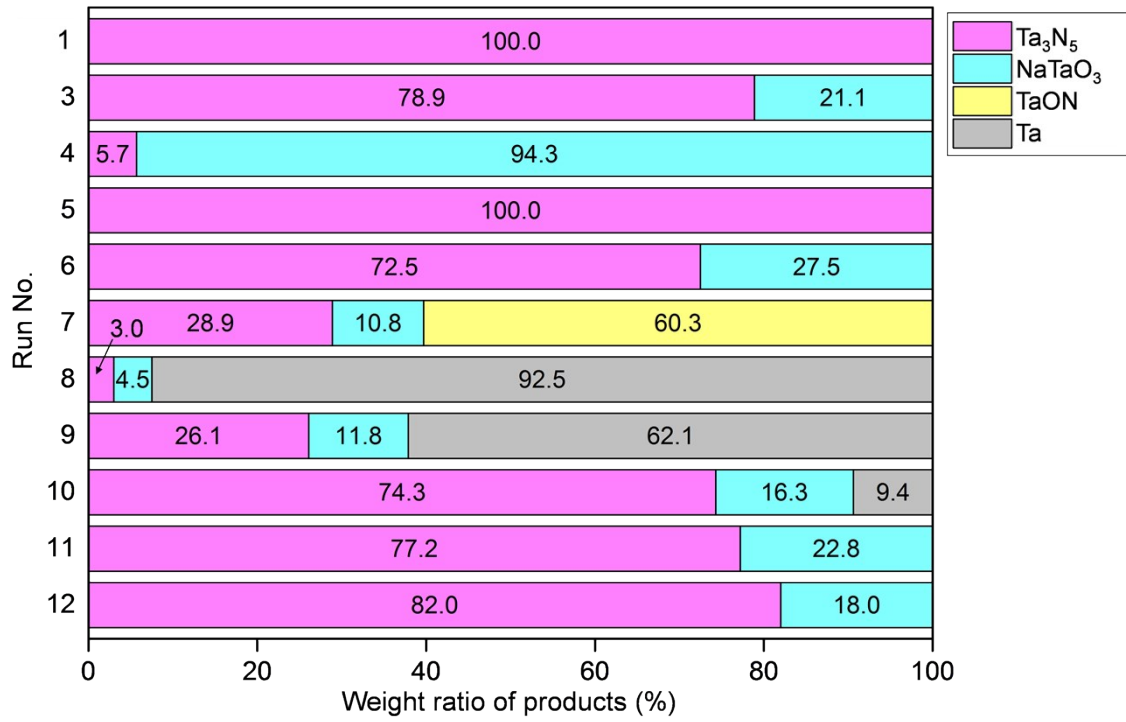

**Fig. S4** Weight ratio of the crystalline phases of the products estimated using the RIR method. The run nos. shown in this figure correspond to the run nos. in Table 1.

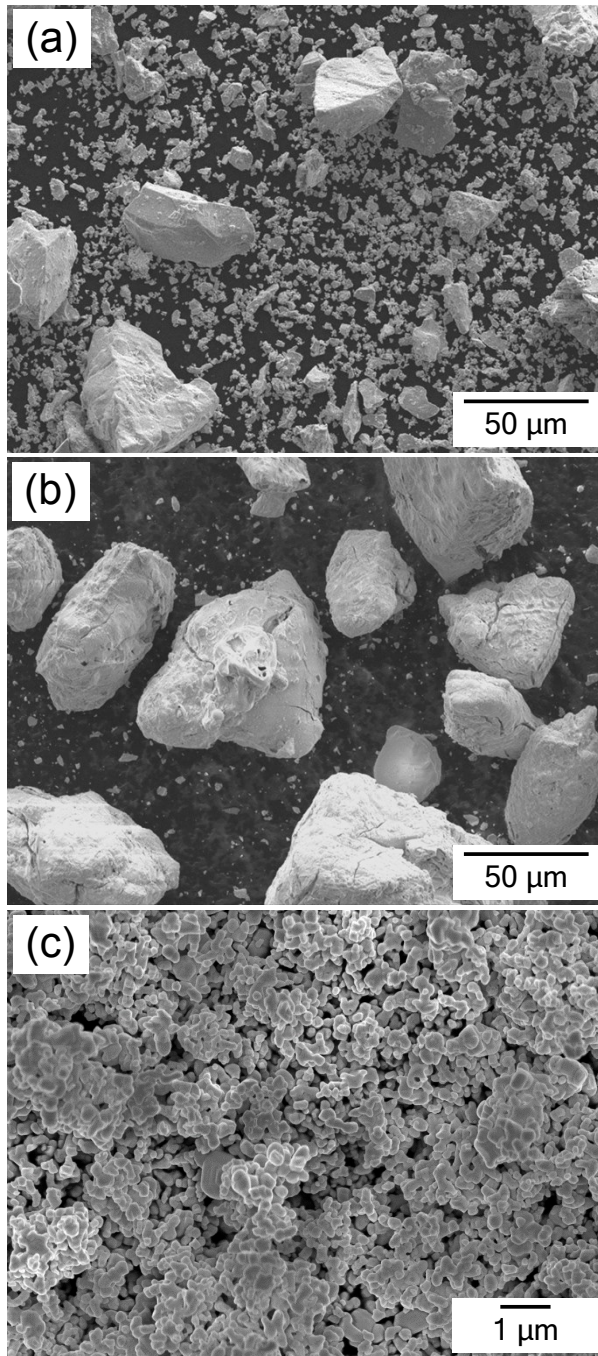

**Fig. S5** SEM images of the (a) large Ta, (b) TaCl<sub>5</sub>, and (c) Ta<sub>2</sub>O<sub>5</sub> powders.

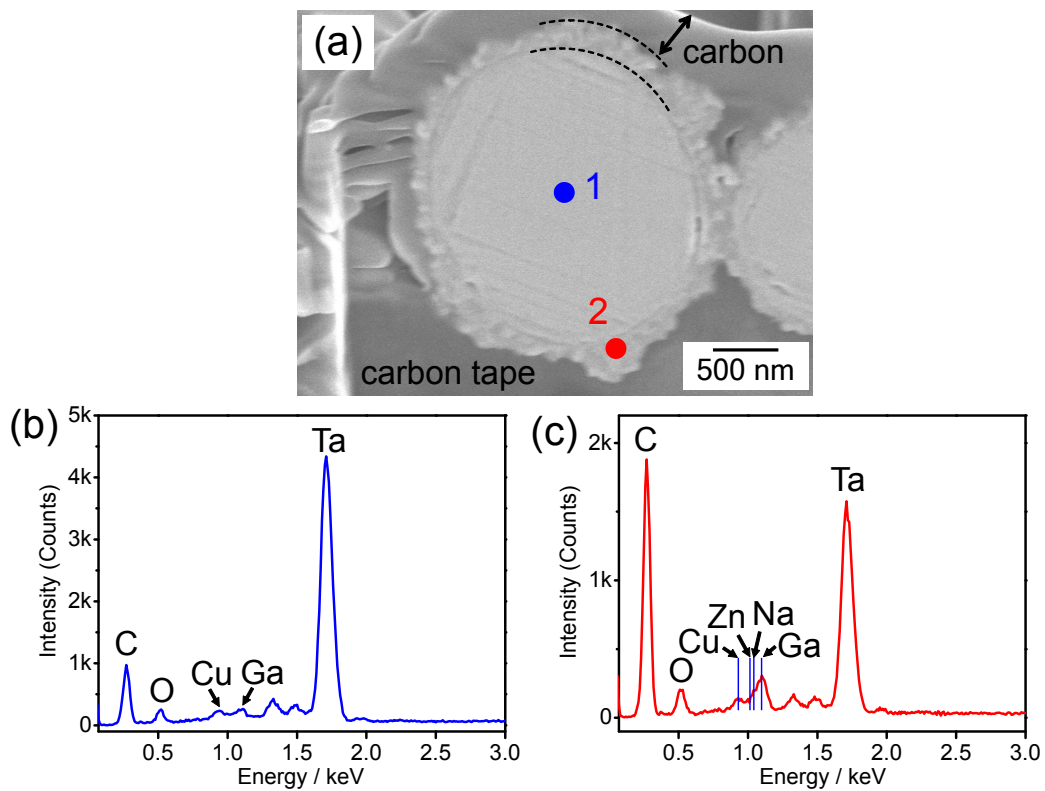

**Fig. S6** (a) Cross-sectional SEM image and (b and c) corresponding EDS point analyses of the crystals grown using small Ta powder at 600 °C for 0 h. Cu and Zn were detected from the sample stage for FESEM observation, while Ga contamination occurred during FIB milling with a Ga-ion source.

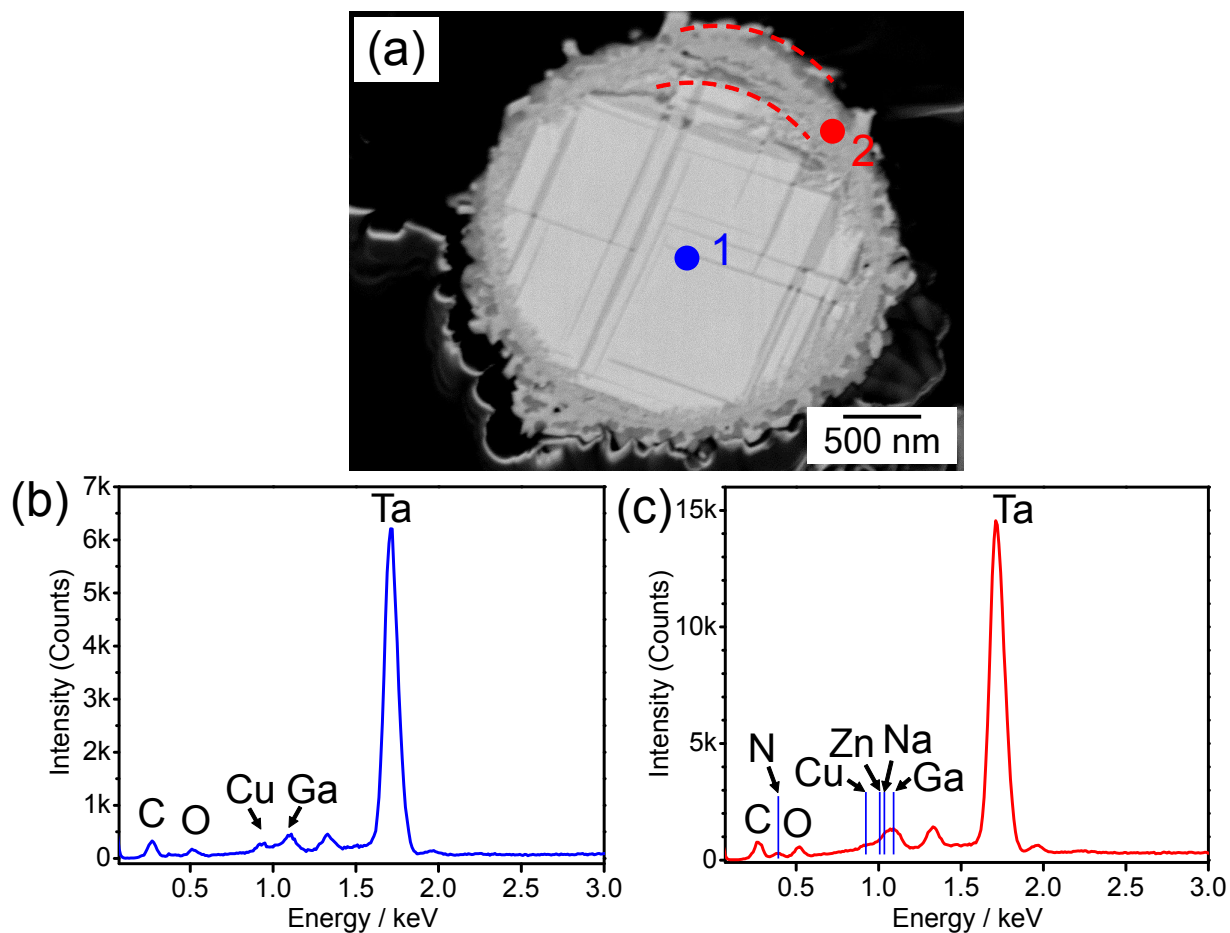

**Fig. S7** (a) Cross-sectional SEM composition image and (b and c) the corresponding EDS point analyses of the crystals grown using small Ta powder at 700 °C for 0 h. Cu and Zn were detected from the sample stage for FESEM observation, while Ga contamination occurred during FIB milling with a Ga-ion source.

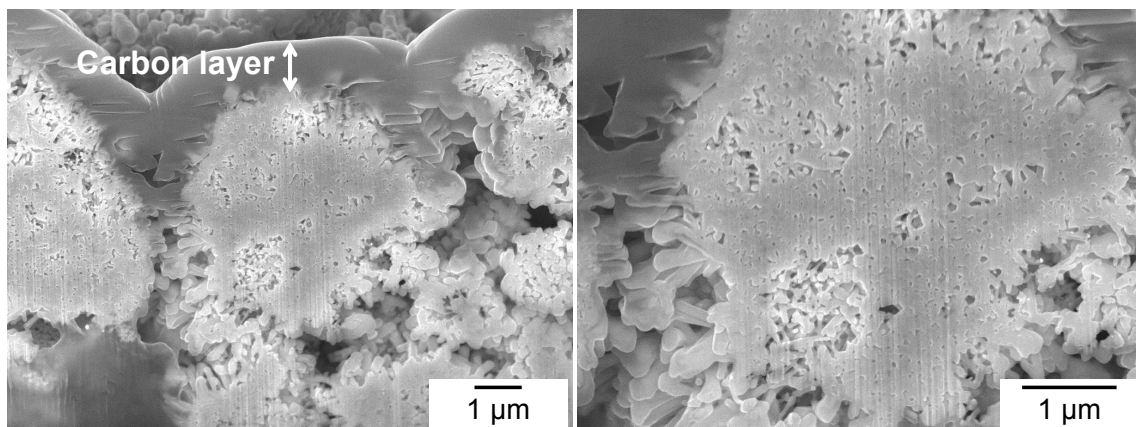

**Fig. S8** (a) Low- and (b) high-magnification cross-sectional SEM images of the crystals grown using the large Ta powder.
